# Supplementary material for: Zic family member 5 promotes survival in human pancreatic cancer and cholangiocarcinoma cells
Source: PubMed Central journal article supplement — Biochem Biophys Rep. 2022 Jun 2;31:101289. doi: 10.1016/j.bbrep.2022.101289 (PMC9166430; doi:10.1016/j.bbrep.2022.101289), 2022-06-02

Figure 3A Western blot (n=3)  
**PANC-1**

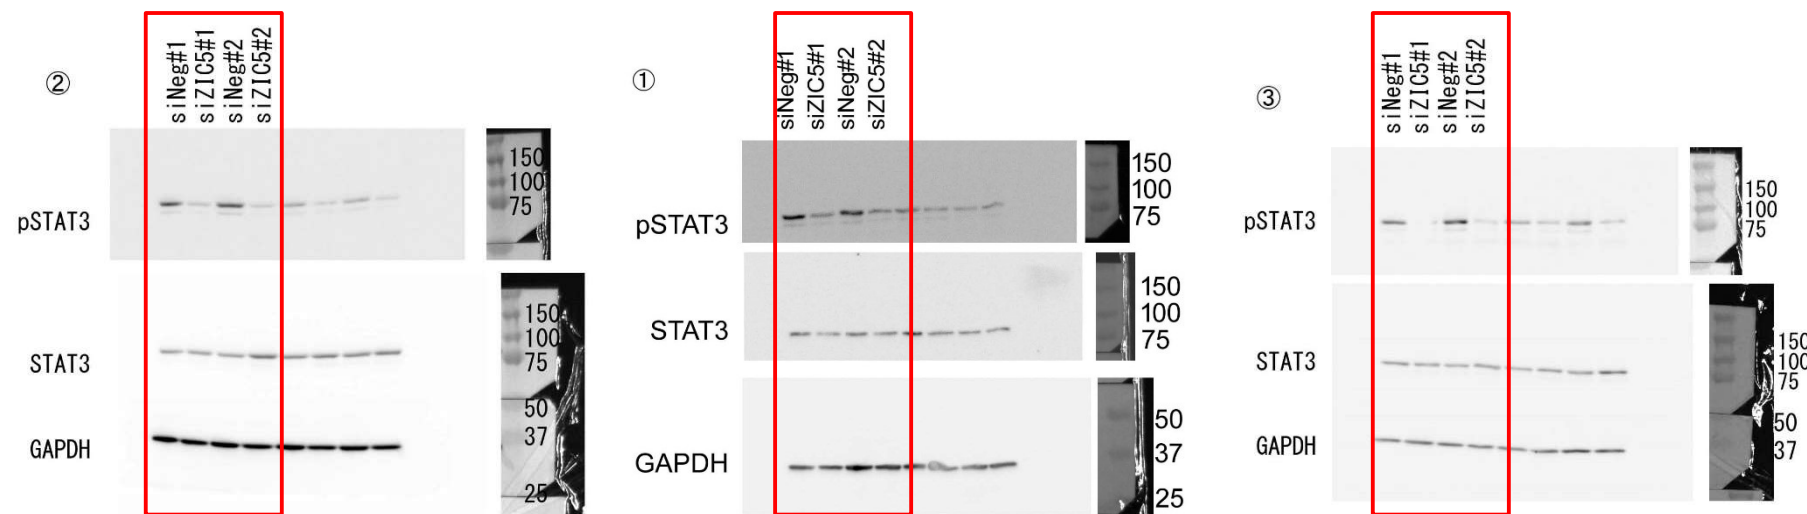

**RBE**

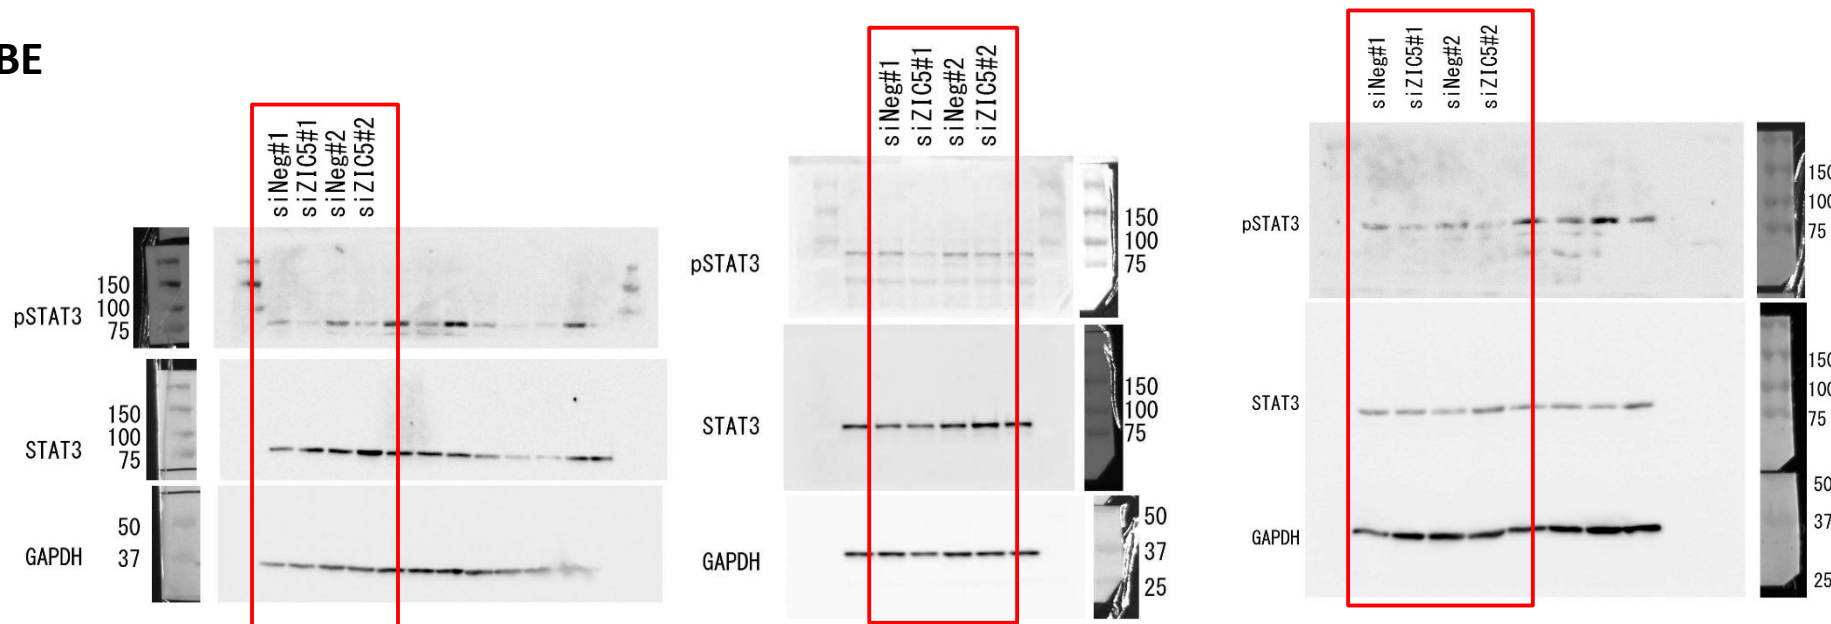

Figure 3B Western blot (n=3)

### PANC-1

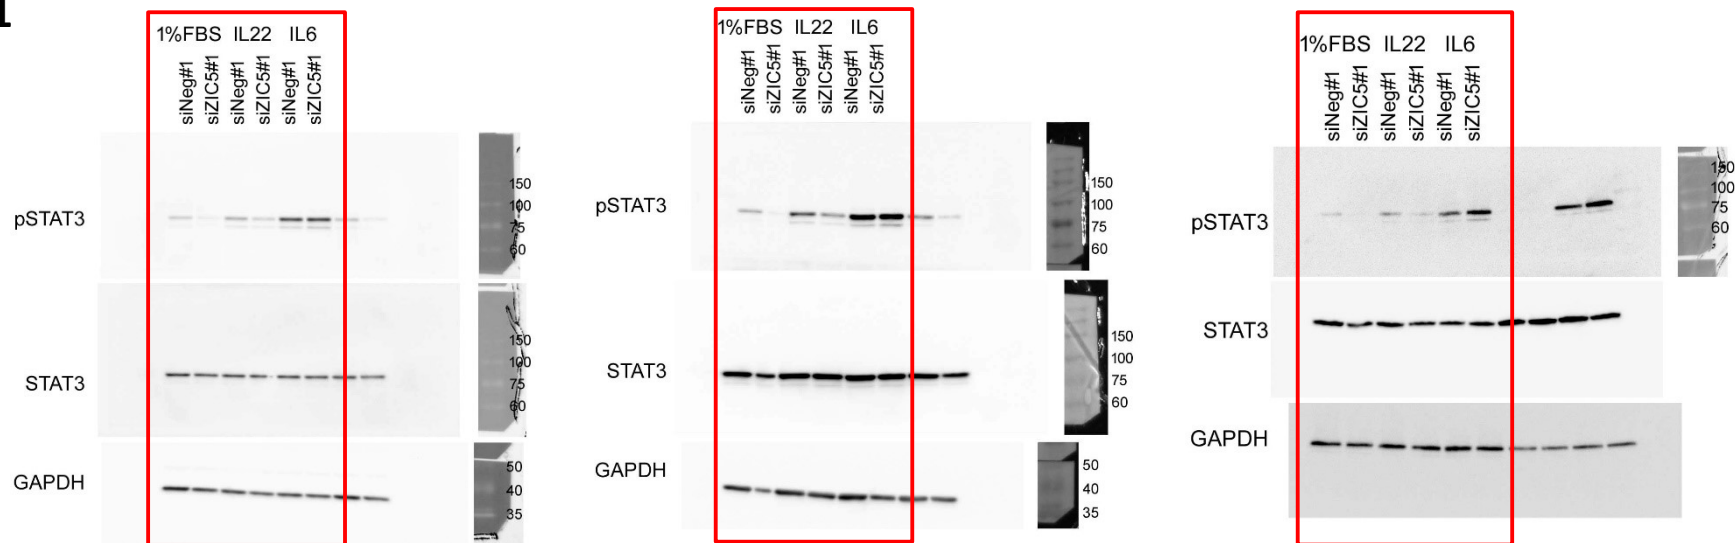

### RBE

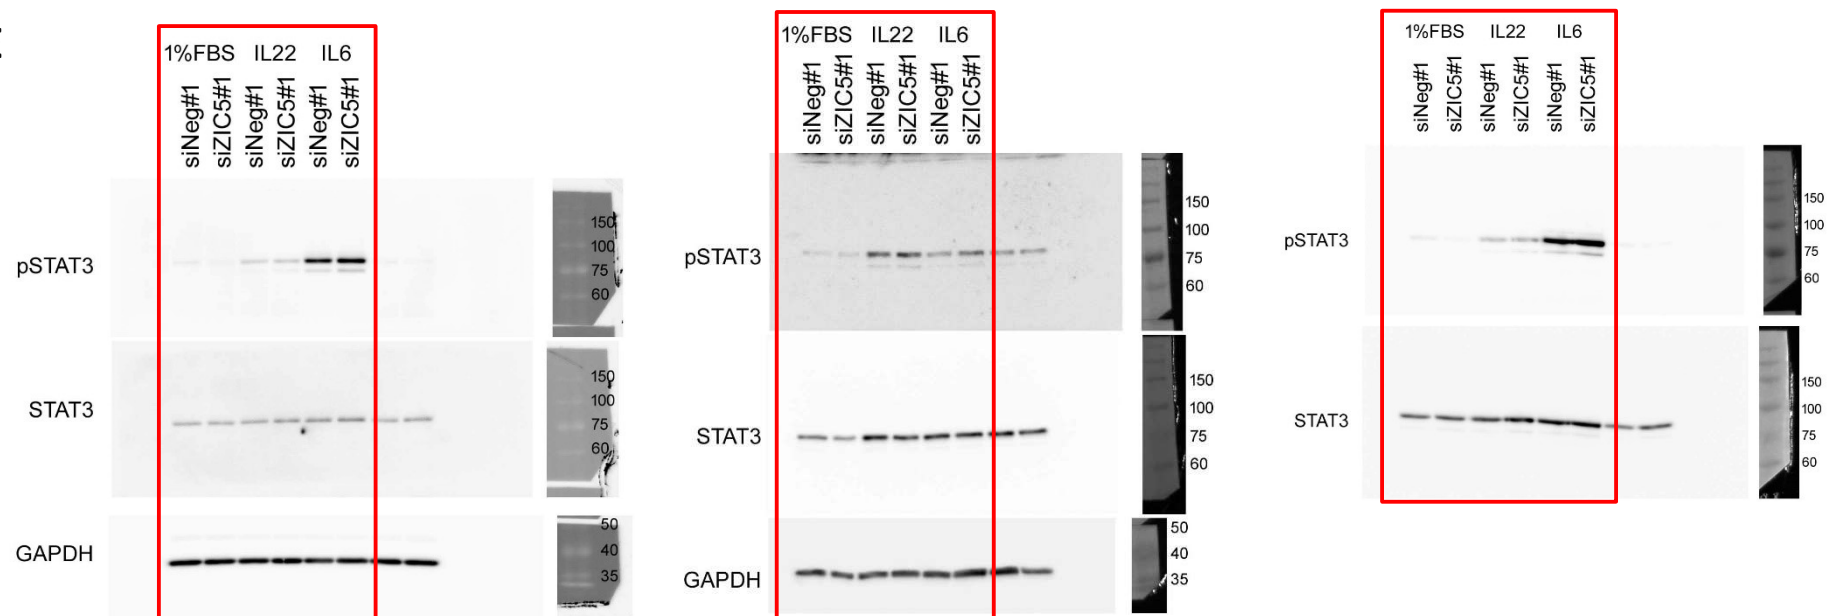

# Supplementary Figure 2A Western blot (n=3)

## MiaPaca-2

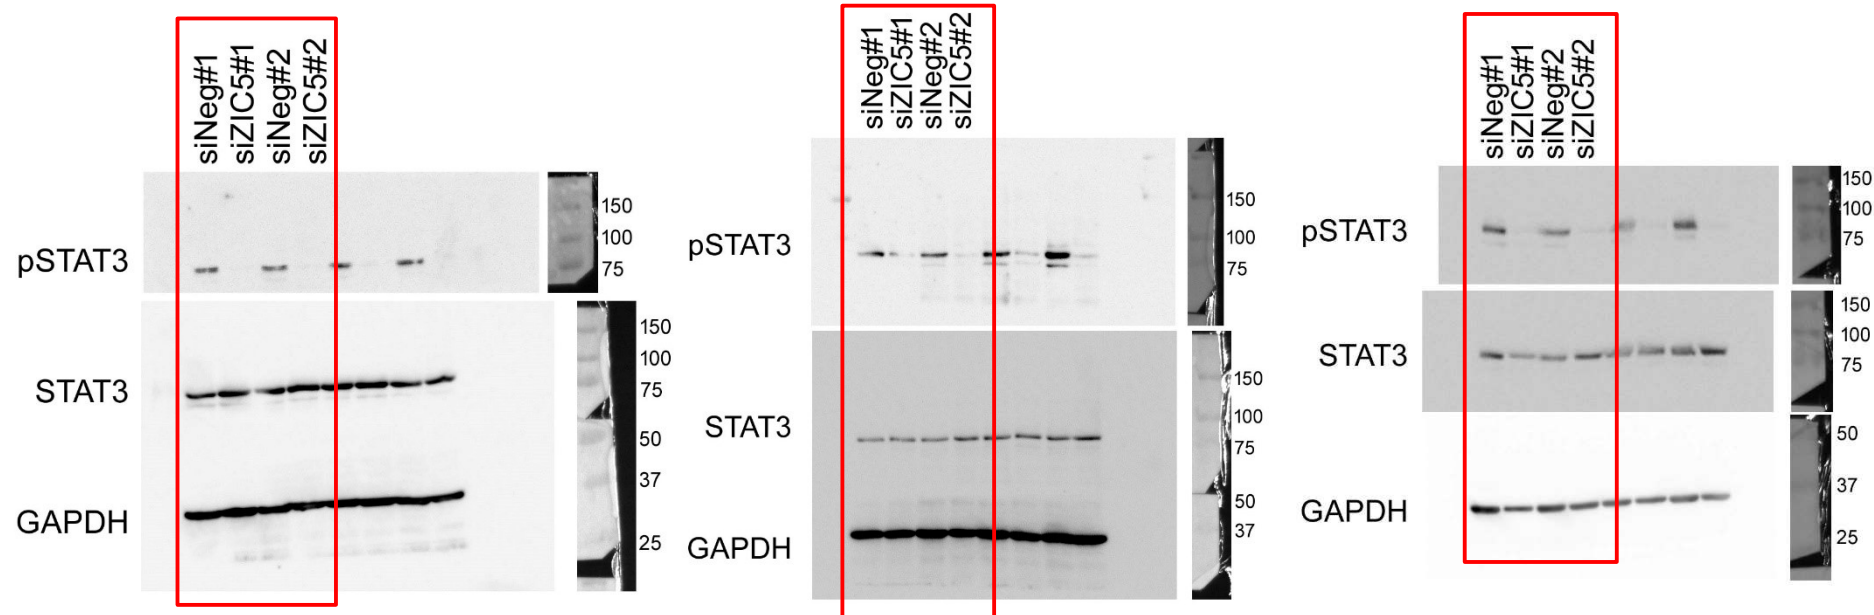

# Supplementary Figure 2B Western blot (n=3)

## MiaPaca-2

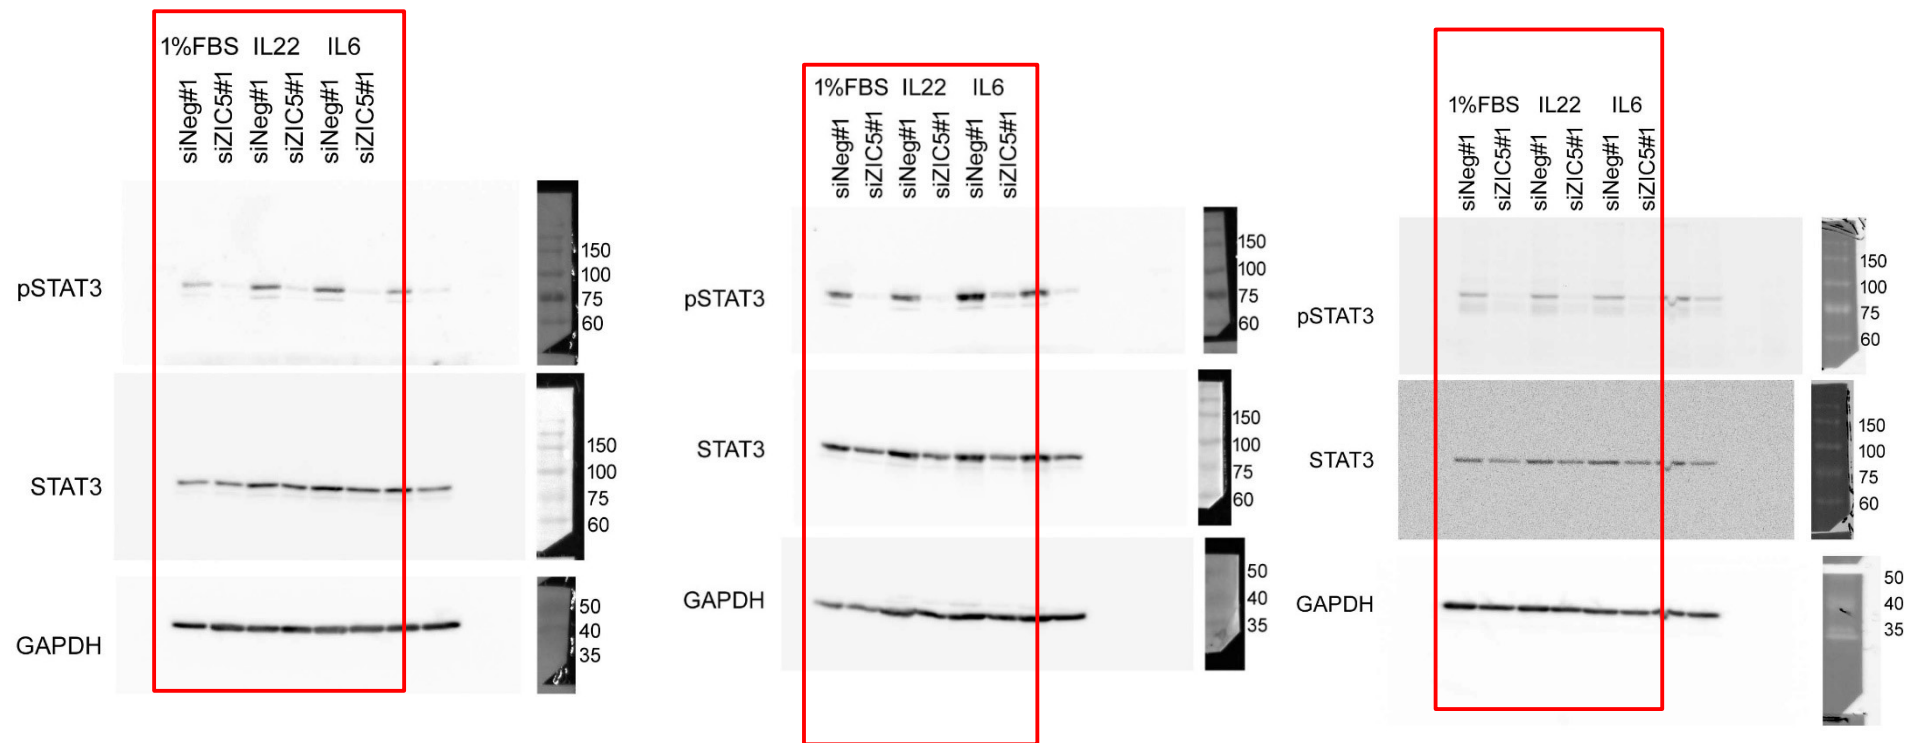

Supplement: mmc4.pdf [file mmc4.pdf]
